# Supplementary material for: Pediococcus acidilactici pA1c® Improves the Beneficial Effects of Metformin Treatment in Type 2 Diabetes by Controlling Glycaemia and Modulating Intestinal Microbiota
Source: MDPI journal article supplement (doi:10.3390/pharmaceutics15041203), 2023-04-10
Supplement: s1 [file s1]

## **Supplementary materials**

**Table S1.** Nutritional information TD.06414 (Envigo)

| Formula                         | g/Kg  | Composition  | % by weight | % kcal from |
|---------------------------------|-------|--------------|-------------|-------------|
| Lard                            | 310.0 | Fat          | 34.3        | 60.3        |
| Casein                          | 265.0 | Carbohydrate | 27.3        | 21.4        |
| Maltodextrin                    | 160.0 | Protein      | 23.5        | 18.3        |
| Sucrose                         | 90.0  | Kcal/g       | 5.1         |             |
| Cellulose                       | 65.5  |              |             |             |
| Mineral Mix, AIN-93G-MX (94046) | 48.0  |              |             |             |
| Soybean Oil                     | 30.0  |              |             |             |
| Vitamin Mix, AIN-93-VX (94047)  | 21.0  |              |             |             |
| L-Cystine                       | 4.0   |              |             |             |
| Calcium Phosphate, dibasic      | 3.4   |              |             |             |
| Choline Bitartrate              | 3.0   |              |             |             |
| Blue Food Color                 | 0.1   |              |             |             |

Information obtained from Envigo Teklad Diets

**Table S2.** Sequences of primers used in gene expression analysis.

| Target gene                    | Forward/<br>Reverse | Primer sequence (5' to 3') | Source |
|--------------------------------|---------------------|----------------------------|--------|
| <i>Acox</i>                    | F                   | CTATGGGATCAGCCAGAAAG       | [105]  |
|                                | R                   | AGTCAAAGGCATCCACCAA        |        |
| <i>Cpt1</i>                    | F                   | CGAGGATTCTCTGGAAGTGC       | [105]  |
|                                | R                   | GGTCGCTTCTTCAAGGTCTG       |        |
| <i>Fasn</i>                    | F                   | AGCCATGGAGGAGGTGGTGAT      | [106]  |
|                                | R                   | GTGTGCCTGCTTGGGGTGGAC      |        |
| <i>Gck</i>                     | F                   | CTTCACCTTCTCCTTCCCTGTAA    | [107]  |
|                                | R                   | AAAGTCCCCTCTCCTCTTGATAG    |        |
| <i>G6Pase</i>                  | F                   | CACCGACTACTACAGCAACAGC     | [107]  |
|                                | R                   | AGAATCCCAACCACAAGATGAC     |        |
| <i>Il-1<math>\beta</math></i>  | F                   | TCGCTCAGGGTCACAAGAAA       | [106]  |
|                                | R                   | CATCAGAGGCAAGGAGGAAAAC     |        |
| <i>Il-6</i>                    | F                   | ACAAGTCGGAGGCTTAATTACACAT  | [106]  |
|                                | R                   | TTGCCATTGCACAACCTCTTTTC    |        |
| <i>Ppara</i>                   | F                   | ACTGGTAGTCTGCAAAACCAAA     | [106]  |
|                                | R                   | AGAGCCCCATCTGTCCTCTC       |        |
| <i>Ppar<math>\gamma</math></i> | F                   | GCTGTTATGGGTGAAACTCTG      | [108]  |
|                                | R                   | GAATAATAAGGTGGAGATGCAGG    |        |
| <i>Pepck</i>                   | F                   | AGTCATCATCACCCAAGAGC       | [107]  |
|                                | R                   | GGGATGACATACATGGTGC        |        |
| <i>Rplp0</i>                   | F                   | AACATCTCCCCCTTCTCCTT       | [106]  |
|                                | R                   | GAAGGCCTTGACCTTTTCAG       |        |
| <i>Srebp</i>                   | F                   | CACTTCATCAAGGCAGACTC       | [106]  |
|                                | R                   | CGGTAGCGCTTCTCAATGGC       |        |

*Acox*: acyl-coenzyme A oxidase; *Cpt1*: carnitine palmitoyltransferase 1; *Fasn*: fatty acid synthase; *Gck*: glucokinase; *G6Pase*: glucose 6 phosphatase; *Il-1 $\beta$* : interleukine-1 $\beta$ ; *Il-6*: interleukin-6; *Ppara*: peroxisome proliferator-activated receptor  $\alpha$ ; *Ppar $\gamma$* : peroxisome proliferator-activated receptor  $\gamma$ ; *Pepck*: phosphoenolpyruvate carboxykinase; *Rplp0*: ribosomal protein P0; *Srebp*: sterol regulatory element-binding protein.

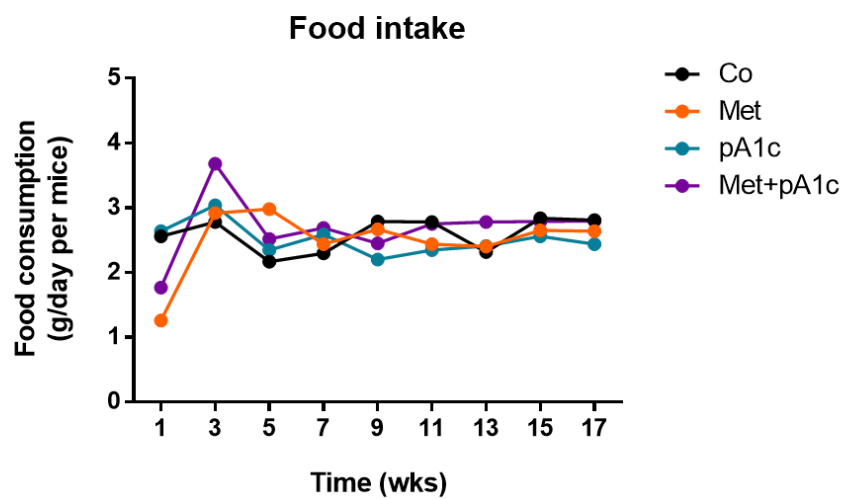

**Figure S1.** Average food intake in all the experimental groups during the study.

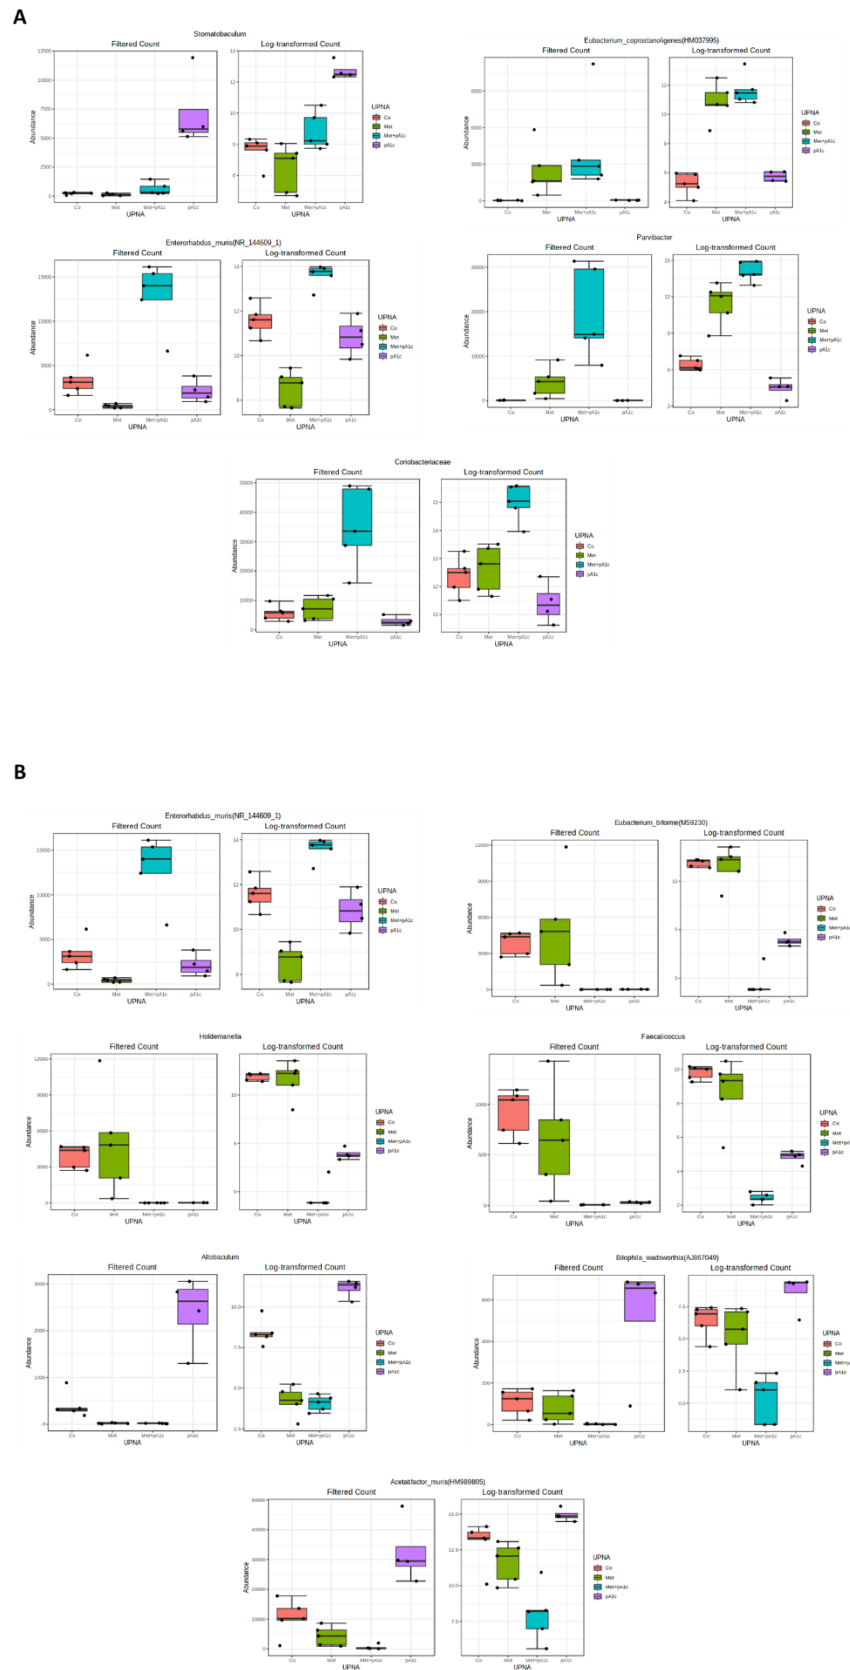

**Figure S2.** Abundance of (A) upregulated and (B) downregulated taxa.

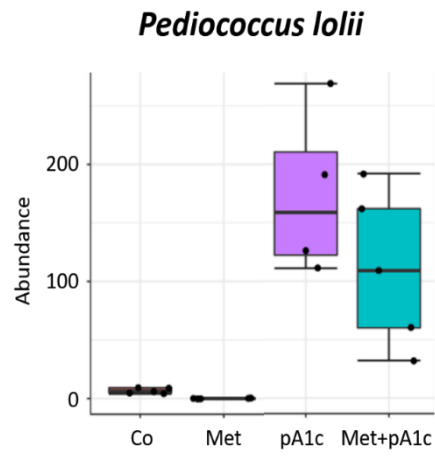

**Figure S3.** Abundance (n° of reads) of *Pediococcus lolii* in the study groups.
